# Supplementary material for: Exploring Influence of Production Area and Harvest Time on Specialized Metabolite Content of Glycyrrhiza glabra Leaves and Evaluation of Antioxidant and Anti-Aging Properties
Source: MDPI journal article supplement (doi:10.3390/antiox13010093), 2024-01-12
Supplement: s1 [file s1]

# Supplementary material

of

## Exploring Influence of Production Area and Harvest Time on Specialized Metabolite Content of *Glycyrrhiza glabra* Leaves and Evaluation of Antioxidant and Anti-Ageing Properties

Teresa Docimo <sup>1</sup>, Rita Celano <sup>2,3,\*</sup>, Alessia Lambiase <sup>3,4</sup>, Rosa Di Sanzo <sup>5</sup>, Simona Serio <sup>2,6</sup>, Valentina Santoro <sup>2,3</sup>, Paola Coccetti <sup>3,4</sup>, Mariateresa Russo <sup>5</sup>, Luca Rastrelli <sup>2,3</sup> and Anna Lisa Piccinelli <sup>2,3</sup>

<sup>1</sup> Institute of Bioscience and BioResources, National Research Council, 80055 Portici, Italy; [teresa.docimo@ibbr.cnr.it](mailto:teresa.docimo@ibbr.cnr.it)

<sup>2</sup> Department of Pharmacy, University of Salerno, Via Giovanni Paolo II 132, 84084 Fisciano, Italy; [sserio@unisa.it](mailto:sserio@unisa.it) (S.S.); [vsantoro@unisa.it](mailto:vsantoro@unisa.it) (V.S.); [rastrelli@unisa.it](mailto:rastrelli@unisa.it) (L.R.); [apiccinelli@unisa.it](mailto:apiccinelli@unisa.it) (A.L.P.)

<sup>3</sup> National Biodiversity Future Center (NBFC), 90133 Palermo, Italy; [a.lambiase1@campus.unimib.it](mailto:a.lambiase1@campus.unimib.it) (A.L.); [paola.coccetti@unimib.it](mailto:paola.coccetti@unimib.it) (P.C.)

<sup>4</sup> Department of Biotechnology and Biosciences, University of Milano-Bicocca, 20126 Milano, Italy

<sup>5</sup> Department of Agriculture Science, Food Chemistry, Safety and Sensoromic Laboratory (FoCuSS Lab), University of Reggio Calabria, Via Salita Melissari, 89124 Reggio Calabria, Italy; [rosa.disanzo@unirc.it](mailto:rosa.disanzo@unirc.it) (R.D.S.); [mariateresa.russo@unirc.it](mailto:mariateresa.russo@unirc.it) (M.R.)

<sup>6</sup> PhD Program in Drug Discovery and Development, University of Salerno, Via Giovanni Paolo II 132, 84084 Fisciano, Italy

\* Correspondence: [rcelano@unisa.it](mailto:rcelano@unisa.it)

**Table S1.** Level of the main *G. glabra* leaves according to the production area (P) and harvesting time (HT) on metabolite content of *G. glabra* leaves.

|                                            | GGL compound <sup>1,2</sup> (mg/g of dry leaf) |                   |                  |                   |                   |                    |                    |                   |                    |                   |                   |                    |                    |                    |
|--------------------------------------------|------------------------------------------------|-------------------|------------------|-------------------|-------------------|--------------------|--------------------|-------------------|--------------------|-------------------|-------------------|--------------------|--------------------|--------------------|
|                                            | 1                                              | 2 <sup>3</sup>    | L11              | L12               | L17 <sup>4</sup>  | L29                | L36                | L35 <sup>5</sup>  | L46                | L48 <sup>6</sup>  | L33               | L44                | L28 <sup>7</sup>   | L41 <sup>8</sup>   |
| GGL-A*1                                    | 34.7 <sup>a</sup>                              | 15.4 <sup>a</sup> | 6.7 <sup>a</sup> | 4.1 <sup>ab</sup> | 6.0 <sup>b</sup>  | 29.2 <sup>bc</sup> | 26.0 <sup>bc</sup> | 4.5 <sup>b</sup>  | 21.8 <sup>bc</sup> | 4.9 <sup>de</sup> | 26.7 <sup>b</sup> | 33.2 <sup>a</sup>  | 11.0 <sup>b</sup>  | 17.6 <sup>a</sup>  |
| GGL-A*2                                    | 35.3 <sup>a</sup>                              | 14.9 <sup>a</sup> | 4.5 <sup>b</sup> | 2.8 <sup>c</sup>  | 4.9 <sup>bc</sup> | 54.5 <sup>a</sup>  | 42.1 <sup>a</sup>  | 3.5 <sup>c</sup>  | 31.0 <sup>a</sup>  | 7.7 <sup>c</sup>  | 34.8 <sup>a</sup> | 29.6 <sup>a</sup>  | 12.8 <sup>a</sup>  | 8.8 <sup>bc</sup>  |
| GGL-A*3                                    | 22.6 <sup>c</sup>                              | 8.1 <sup>bc</sup> | 3.4 <sup>c</sup> | 2.8 <sup>c</sup>  | 4.5 <sup>c</sup>  | 19.9 <sup>de</sup> | 17.6 <sup>de</sup> | 2.4 <sup>d</sup>  | 7.8 <sup>fg</sup>  | 6.8 <sup>cd</sup> | 4.8 <sup>fg</sup> | 3.9 <sup>cd</sup>  | 2.8 <sup>e</sup>   | 0.5 <sup>ef</sup>  |
| GGL-B*1                                    | 30.0 <sup>b</sup>                              | 15.1 <sup>a</sup> | 6.8 <sup>a</sup> | 4.2 <sup>a</sup>  | 7.5 <sup>a</sup>  | 23.2 <sup>cd</sup> | 26.7 <sup>bc</sup> | 4.8 <sup>ab</sup> | 16.9 <sup>cd</sup> | 3.5 <sup>e</sup>  | 22.1 <sup>c</sup> | 27.1 <sup>ab</sup> | 10.5 <sup>b</sup>  | 11.8 <sup>b</sup>  |
| GGL-B*2                                    | 36.3 <sup>a</sup>                              | 15.2 <sup>a</sup> | 5.3 <sup>b</sup> | 3.6 <sup>b</sup>  | 5.6 <sup>bc</sup> | 51.3 <sup>a</sup>  | 45.6 <sup>a</sup>  | 5.4 <sup>a</sup>  | 25.6 <sup>b</sup>  | 26.6 <sup>a</sup> | 31.4 <sup>a</sup> | 26.2 <sup>ab</sup> | 11.7 <sup>ab</sup> | 5.9 <sup>cd</sup>  |
| GGL-B*3                                    | 23.2 <sup>c</sup>                              | 10.1 <sup>b</sup> | 2.2 <sup>d</sup> | 2.1 <sup>d</sup>  | 2.4 <sup>d</sup>  | 33.3 <sup>b</sup>  | 32.0 <sup>b</sup>  | 3.2 <sup>cd</sup> | 11.2 <sup>ef</sup> | 13.7 <sup>b</sup> | 8.6 <sup>ef</sup> | 6.5 <sup>cd</sup>  | 4.2 <sup>cd</sup>  | 2.3 <sup>def</sup> |
| GGL-C*1                                    | 13.3 <sup>d</sup>                              | 7.1 <sup>c</sup>  | 2.2 <sup>d</sup> | 1.5 <sup>e</sup>  | 2.6 <sup>d</sup>  | 13.4 <sup>ef</sup> | 14.0 <sup>e</sup>  | 1.5 <sup>e</sup>  | 7.3 <sup>fg</sup>  | 7.3 <sup>c</sup>  | 9.4 <sup>e</sup>  | 11.0 <sup>c</sup>  | 3.2 <sup>de</sup>  | 2.8 <sup>def</sup> |
| GGL-C*2                                    | 20.5 <sup>c</sup>                              | 8.2 <sup>bc</sup> | 1.9 <sup>d</sup> | 1.7 <sup>de</sup> | 3.1 <sup>d</sup>  | 23.8 <sup>cd</sup> | 22.3 <sup>cd</sup> | 2.9 <sup>cd</sup> | 14.4 <sup>de</sup> | 14.5 <sup>b</sup> | 15.9 <sup>d</sup> | 19.9 <sup>b</sup>  | 5.0 <sup>c</sup>   | 4.3 <sup>de</sup>  |
| GGL-C*3                                    | 9.6 <sup>e</sup>                               | 3.9 <sup>d</sup>  | 0.9 <sup>e</sup> | 0.8 <sup>f</sup>  | 1.1 <sup>e</sup>  | 7.6 <sup>f</sup>   | 4.8 <sup>f</sup>   | 1.2 <sup>e</sup>  | 3.8 <sup>g</sup>   | 4.0 <sup>e</sup>  | 1.3 <sup>g</sup>  | 1.4 <sup>d</sup>   | 1.1 <sup>f</sup>   | 0.3 <sup>f</sup>   |
| Analysis of Variance (F-ratio, * p < 0.01) |                                                |                   |                  |                   |                   |                    |                    |                   |                    |                   |                   |                    |                    |                    |
| P (2) <sup>9</sup>                         | 493 *                                          | 212 *             | 285 *            | 348 *             | 146 *             | 210 *              | 211 *              | 155 *             | 101 *              | 286 *             | 216 *             | 41 *               | 493 *              | 56 *               |
| HT (2) <sup>9</sup>                        | 223 *                                          | 127 *             | 207 *            | 136 *             | 100 *             | 250 *              | 171 *              | 69 *              | 168 *              | 521 *             | 531 *             | 158 *              | 634 *              | 120 *              |
| P x HT (4) <sup>9</sup>                    | 10 *                                           | 5 *               | 25 *             | 26 *              | 22 *              | 26 *               | 13 *               | 14 *              | 11 *               | 179 *             | 25 *              | 10 *               | 47 *               | 25 *               |

<sup>1</sup> vincenin 2 (1), iso/shaftoside (2), rutin (L11), isoquercitrin (L12), astragalin (L17), pinocembrin (L29), licoflavanone (L36), 8/6-prenylnaringenin (L35), glabranin (L46), glabranin isomer (L48), dihydro-3,3',4'-trihydroxy-5-O-prenylstilbene (L33), dihydro-3,5,4'-trihydroxy-4,5'-diprenylstilbene (L44), dihydro-3,5,3',4'-tetrahydroxy-5'-prenylstilbene (L28), dihydro-3,5,3',4'-tetrahydroxy-4,5'-diprenylstilbene (L41); <sup>2</sup> for a given compound, different superscript letters in the same column indicate significantly different values ( $P \leq 0.05$  by a post-hoc Tukey's HSD test); <sup>3</sup> levels of 2 are expressed as *vincenin* equivalent; <sup>4</sup> levels of L17 are expressed as *vincenin* equivalent; <sup>5</sup> L35 levels are expressed as *licoflavanone* equivalent; <sup>6</sup> L48 levels are expressed as *glabranin* equivalent; <sup>7</sup> L28 levels are expressed as *stilbene* L33 equivalent; <sup>8</sup> L41 levels are expressed as *stilbene* L44; <sup>9</sup> degrees of freedom in brackets.

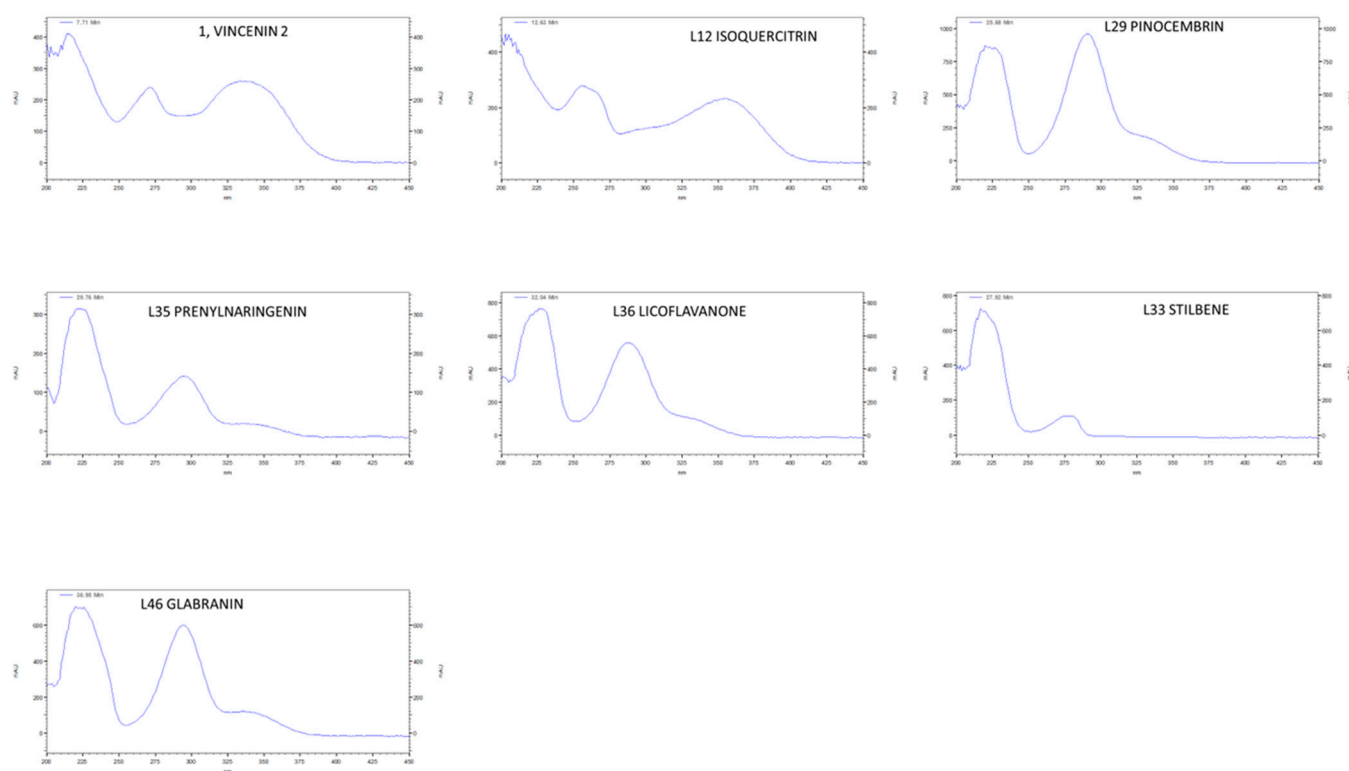

**Figure S1.** UV spectra of GGL markers.

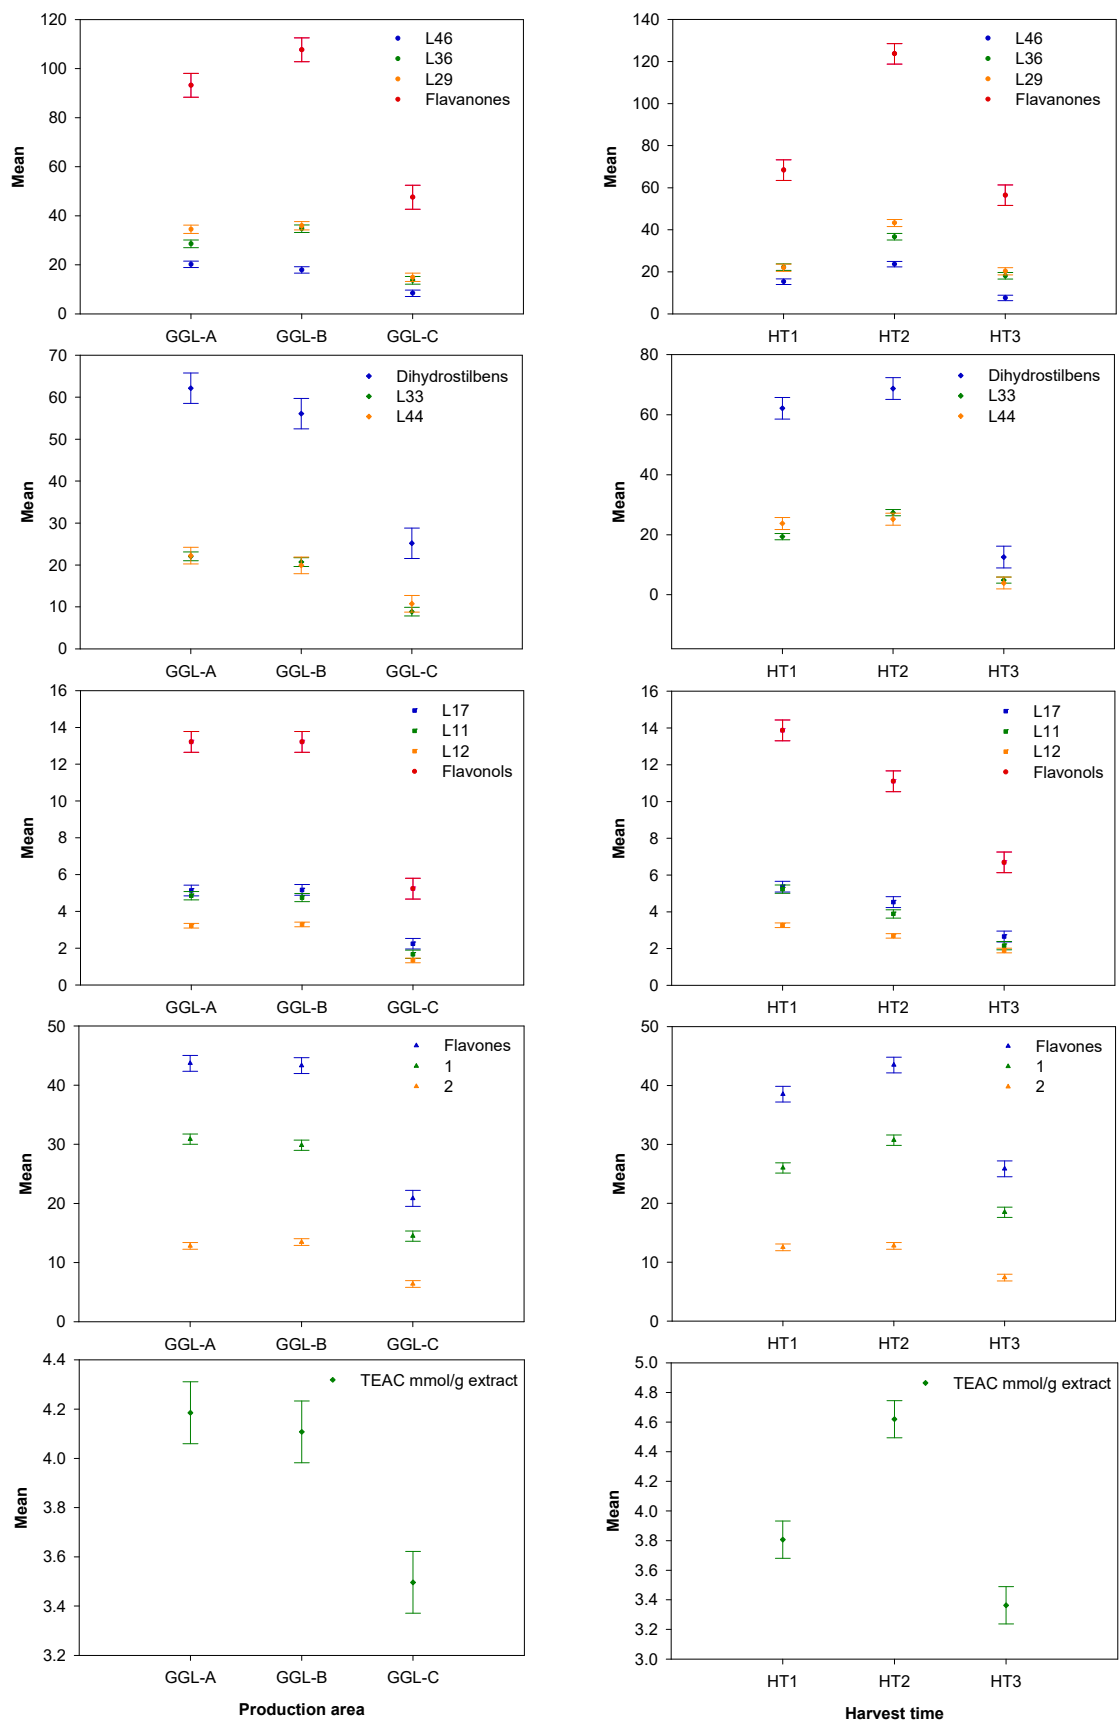

<sup>a</sup> Bars display the confidence intervals for the level means using the mean squared error from the ANOVA. A pair of intervals that do not overlap indicates a statistically significant difference between the means at the selected confidence level ( $p < 0.05$ ).

**Figure S2.** Means plot of metabolite contents and TEAC of *G. glabra* leaves according to the production area (P) and harvesting time (HT). <sup>a</sup>
